# Supplementary material for: Self-help cognitive behavioural therapy for anxiety in pulmonary hypertension: pilot randomised controlled trial
Source: PubMed Central journal article supplement — ERJ Open Res. 2022 Mar 7;8(1):00526-2021. doi: 10.1183/23120541.00526-2021 (PMC8899500; doi:10.1183/23120541.00526-2021), 2022-03-07
Supplement: 00526-2021.SUPPLEMENT1.pdf [file 00526-2021.SUPPLEMENT1.pdf]

## Supplement 1

### *Outline of the intervention*

| Booklet                         | Content                                                                                                                                                                                                                                                                                                                                                                                                                     | Exercises                                                                                                                                                                                                                                                                                                                                            |
|---------------------------------|-----------------------------------------------------------------------------------------------------------------------------------------------------------------------------------------------------------------------------------------------------------------------------------------------------------------------------------------------------------------------------------------------------------------------------|------------------------------------------------------------------------------------------------------------------------------------------------------------------------------------------------------------------------------------------------------------------------------------------------------------------------------------------------------|
| 1<br>'Anxiety and PH'           | <ul style="list-style-type: none"> <li>• Introduction to CBT model</li> <li>• Introduction to the intervention</li> <li>• Normalise difficulties with anxiety through case studies</li> <li>• Psychoeducation on psychosocial impact of PH, anxiety (panic, fear, stress and worry) and anxiety in PH</li> <li>• Highlight the importance of coping strategies</li> </ul>                                                   | <ul style="list-style-type: none"> <li>• Explore and identify common symptoms of anxiety</li> <li>• Complete the four-areas model – develop a mini-formulation of difficulties</li> <li>• Slow breathing exercise</li> </ul>                                                                                                                         |
| 2<br>'What keeps anxiety going' | <ul style="list-style-type: none"> <li>• Psychoeducation on anxiety – focusing on avoidance, reassurance seeking, safety behaviours, symptoms and unhelpful thoughts about health – all specific to experiences of PH</li> </ul>                                                                                                                                                                                            | <ul style="list-style-type: none"> <li>• Explore and recognise maintenance cycles</li> <li>• Develop a here and now formulation of difficulties recognising triggers, reactions, unhelpful coping strategies and short- and long-term consequences</li> <li>• Two mindfulness exercises – focusing on bodily symptoms and everyday events</li> </ul> |
| 3<br>'The power of thoughts'    | <ul style="list-style-type: none"> <li>• Psychoeducation on cognitive biases grounded in the four-factor model: predicting the future, mind reading, over-generalisation, all-or-nothing thinking and self-criticism</li> <li>• Challenging unhelpful thoughts – evidence for and against</li> <li>• Normalise difficulties with anxiety through case studies</li> <li>• Develop techniques to help manage worry</li> </ul> | <ul style="list-style-type: none"> <li>• Recognise unhelpful thinking biases</li> <li>• Thought challenging</li> <li>• Worry tree</li> <li>• Worry delay</li> <li>• Thought monitoring exercise</li> </ul>                                                                                                                                           |
| 4<br>'The power                 | <ul style="list-style-type: none"> <li>• Psychoeducation on graded exposure to manage anxiety; pacing, and boom and bust cycle to manage pain and fatigue</li> </ul>                                                                                                                                                                                                                                                        | <ul style="list-style-type: none"> <li>• Development of anxiety hierarchy</li> <li>• Development of pacing hierarchy</li> </ul>                                                                                                                                                                                                                      |

---

of your  
actions'

- Psychoeducation on other factors affecting anxiety: routine, diet, sleep, social support, keeping physically active and confidence/assurance
- Relapse prevention reviewing what participants have learnt, skills they have developed, and identifying and managing setbacks
- Signpost to other services for mental health and PH-related problems

- Create a plan to cope with setbacks
  - Progressive muscle relaxation exercise
- 

CBT = Cognitive Behavioural Therapy; PH = Pulmonary Hypertension
