# Supplementary material for: Self-help cognitive behavioural therapy for anxiety in pulmonary hypertension: pilot randomised controlled trial
Source: PubMed Central journal article supplement — ERJ Open Res. 2022 Mar 7;8(1):00526-2021. doi: 10.1183/23120541.00526-2021 (PMC8899500; doi:10.1183/23120541.00526-2021), 2022-03-07
Supplement: 00526-2021.SUPPLEMENT2.pdf [file 00526-2021.SUPPLEMENT2.pdf]

## Supplement 2

*Baseline data for participants living in the UK or outside of the UK (international). Means and (standard deviations) unless otherwise stated*

| Characteristics                   | UK            | International | <i>p</i> value |
|-----------------------------------|---------------|---------------|----------------|
| Number of participants            | n=46          | n=31          | 0.09           |
| Condition                         |               |               | 0.38           |
| CBT Self-help                     | n=24          | n=13          | 0.07           |
| Control                           | n=22          | n=18          | 0.53           |
| Demographics                      |               |               |                |
| Age (years)                       | 47.91 (12.59) | 47.67 (14.91) | 0.94           |
| Gender                            |               |               |                |
| Male                              | n=2           | n=2           | 0.43           |
| Female                            | n=44          | n=28          |                |
| Other                             | n=0           | n=1           |                |
| Ethnicity                         |               |               | 0.004          |
| White                             | n=29          | n=16          |                |
| Not reported or not clear         | n=15          | n=4           |                |
| Asian                             | n=1           | n=8           |                |
| Hispanic                          | n=0           | n=1           |                |
| Black                             | n=1           | n=0           |                |
| Latina                            | n=0           | n=2           |                |
| Education (years)                 | 14.54 (5.07)  | 16.42 (2.75)  | 0.07           |
| Employment                        |               |               | 0.07           |
| Employed                          | n=16          | n=11          |                |
| Not employed                      | n=14          | n=8           |                |
| Retired                           | n=12          | n=6           |                |
| Student                           | n=3           | n=0           |                |
| Other                             | n=1           | n=6           |                |
| PH factors                        |               |               |                |
| Type                              |               |               | 0.08           |
| Idiopathic PH                     | n=17          | n=18          |                |
| Chronic thromboembolic PH         | n=12          | n=2           |                |
| Connective tissue disease         | n=5           | n=1           |                |
| Congenital PH                     | n=1           | n=3           |                |
| Familial PH                       | n=0           | n=1           |                |
| Other                             | n=5           | n=4           |                |
| Not sure                          | n=6           | n=2           |                |
| Class                             |               |               | 0.38           |
| I                                 | n=4           | n=4           |                |
| II                                | n=8           | n=9           |                |
| III                               | n=19          | n=8           |                |
| IV                                | n=2           | n=0           |                |
| Not sure                          | n=13          | n=10          |                |
| Years since diagnosis             | 8.21 (8.55)   | 9.25 (9.33)   | 0.62           |
| Psychological factors             |               |               |                |
| Prescribed medication for anxiety | n=12          | n=10          | 0.56           |
| Received therapy for anxiety      | n=20          | n=13          | 0.89           |
| Anxiety                           | 11.74 (5.23)  | 10.19 (5.78)  | 0.23           |

|              |               |              |      |
|--------------|---------------|--------------|------|
| Depression   | 13.13 (5.32)  | 11.68 (5.88) | 0.26 |
| HRQoL        | 40.5 (11.15)  | 39.1 (10.95) | 0.59 |
| Dyspnoea     | 16.5 (9.79)   | 14.03 (8.81) | 0.26 |
| Self-mastery | 24.52 (7.58)  | 25.97 (7.23) | 0.4  |
| CBP-Q        | 69.59 (16.51) | 68.32 (17.4) | 0.75 |

n = Number of participants; PH = Pulmonary Hypertension; HRQoL = Health-Related Quality of Life; CBP-Q = Cognitive and Behavioural Processes Questionnaire; UK = United Kingdom
