# Supplementary material for: Self-help cognitive behavioural therapy for anxiety in pulmonary hypertension: pilot randomised controlled trial
Source: PubMed Central journal article supplement — ERJ Open Res. 2022 Mar 7;8(1):00526-2021. doi: 10.1183/23120541.00526-2021 (PMC8899500; doi:10.1183/23120541.00526-2021), 2022-03-07
Supplement: 00526-2021.SUPPLEMENT3.pdf [file 00526-2021.SUPPLEMENT3.pdf]

### Supplement 3

Baseline data for participants defined as completers vs. non-completers. Means and (standard deviations) unless otherwise stated

| Characteristics           | Completers    | Non-completers | <i>p</i> value |
|---------------------------|---------------|----------------|----------------|
| Number of participants    | n=65          | n=12           | <0.001         |
| Condition                 |               |                | 0.44           |
| CBT Self-help             | n=30          | n=7            |                |
| Control                   | n=35          | n=5            |                |
| Demographics              |               |                |                |
| Age (years)               | 49.27 (13.11) | 40.08 (13.17)  | 0.03           |
| Gender                    |               |                | 0.046          |
| Male                      | n=4           | n=0            |                |
| Female                    | n=61          | n=11           |                |
| Other                     | n=0           | n=1            |                |
| Country                   |               |                | 0.17           |
| UK                        | n=41          | n=5            |                |
| International             | n=24          | n=7            |                |
| Ethnicity                 |               |                | 0.43           |
| White                     | n=29          | n=6            |                |
| Not reported or not clear | n=17          | n=2            |                |
| Asian                     | n=6           | n=3            |                |
| Hispanic                  | n=1           | n=0            |                |
| Black                     | n=1           | n=0            |                |
| Latina                    | n=1           | n=1            |                |
| Education (years)         | 15.47 (4.23)  | 15.18 (4.26)   | 0.84           |
| Employment                |               |                | 0.39           |
| Employed                  | n=25          | n=2            |                |
| Not employed              | n=17          | n=5            |                |
| Retired                   | n=16          | n=2            |                |
| Student                   | n=2           | n=1            |                |
| Other                     | n=5           | n=2            |                |
| PH factors                |               |                |                |
| PH Type                   |               |                | 0.4            |
| Idiopathic PH             | n=30          | n=5            |                |
| Chronic thromboembolic PH | n=14          | n=0            |                |
| Connective tissue disease | n=5           | n=1            |                |
| Congenital PH             | n=3           | n=1            |                |
| Familial PH               | n=1           | n=0            |                |
| Other                     | n=7           | n=2            |                |
| Not sure                  | n=5           | n=3            |                |
| PH Class                  |               |                | 0.86           |
| I                         | n=7           | n=1            |                |
| II                        | n=15          | n=2            |                |
| III                       | n=23          | n=4            |                |
| IV                        | n=2           | n=0            |                |
| Not sure                  | n=18          | n=5            |                |
| Years since diagnosis     | 7.93 (8.36)   | 12.42 (10.64)  | 0.11           |
| Psychological factors     |               |                |                |

|                                   |               |              |      |
|-----------------------------------|---------------|--------------|------|
| Prescribed medication for anxiety | n=18          | n=4          | 0.69 |
| Received therapy for anxiety      | n=12          | n=2          | 0.24 |
| Anxiety                           | 11.75 (5.44)  | 7.67 (4.4)   | 0.02 |
| Depression                        | 2.95 (5.54)   | 10.33 (5.37) | 0.13 |
| HRQoL                             | 40.63 (10.89) | 36.17 (11.4) | 0.2  |
| Dyspnoea                          | 15.92 (9.57)  | 13.25 (8.65) | 0.37 |
| Self-mastery                      | 24.35 (7.4)   | 29.17 (6.38) | 0.04 |
| CBP-Q                             | 69.95 (17.2)  | 63.9 (13.58) | 0.27 |

---

n = Number of participants; PH = Pulmonary Hypertension; HRQoL = Health-Related Quality of Life; CBP-Q = Cognitive and Behavioural Processes Questionnaire; UK = United Kingdom
