# Supplementary material for: Self-help cognitive behavioural therapy for anxiety in pulmonary hypertension: pilot randomised controlled trial
Source: PubMed Central journal article supplement — ERJ Open Res. 2022 Mar 7;8(1):00526-2021. doi: 10.1183/23120541.00526-2021 (PMC8899500; doi:10.1183/23120541.00526-2021), 2022-03-07
Supplement: 00526-2021.SUPPLEMENT4.pdf [file 00526-2021.SUPPLEMENT4.pdf]

## Supplement 4

*Check-in Questionnaire (n=32); values represent n unless otherwise stated*

| Question                                                                 | Great Deal<br>– A Lot | Moderate<br>Amount | None at All –<br>A Little | Mean<br>(SD)   |
|--------------------------------------------------------------------------|-----------------------|--------------------|---------------------------|----------------|
| How much have you looked at the intervention?                            | 15<br>(46.9%)         | 13<br>(40.6%)      | 4<br>(12.5%)              | 3.6<br>(0.97)  |
| How much of the intervention have you understood?                        | 27<br>(84.4%)         | 3<br>(9.3%)        | 2<br>(6.3%)               | 4.35<br>(1.02) |
| How distressing is the intervention?                                     | 2<br>(6.3%)           | 5<br>(15.6%)       | 25<br>(78.1%)             | 1.55<br>(0.74) |
| How difficult is the intervention?                                       | 3<br>(9.4%)           | 6<br>(18.7%)       | 23<br>(71.9%)             | 1.97<br>(1.08) |
| How often have you been using the skills?                                | 16<br>(50%)           | 10<br>(31.2%)      | 6<br>(18.8%)              | 3.29<br>(1.19) |
| How much <b>is</b> the intervention helping with your anxiety?           | 15<br>(46.9%)         | 10<br>(31.2%)      | 7<br>(21.9%)              | 3.23<br>(1.02) |
| How much <b>can</b> the intervention help with your anxiety?             | 30<br>(93.8%)         | 1<br>(3%)          | 1<br>(3%)                 | 4.23<br>(0.68) |
| How much <b>is</b> the intervention helping in other areas of your life? | 10<br>(31.3%)         | 14<br>(43.7%)      | 8<br>(25%)                | 2.97<br>(0.95) |
| How much <b>can</b> the intervention help in other areas of your life?   | 26<br>(81.3%)         | 6<br>(18.7%)       | 0<br>(0%)                 | 4.06<br>(0.68) |

SD = Standard Deviation

*Final Acceptability Questionnaire post-intervention (n=25). Values represent n (%) unless otherwise stated*

| Question                                                        | Great Deal<br>– A Lot | Moderate<br>Amount | A Little   | Mean<br>(SD)  |
|-----------------------------------------------------------------|-----------------------|--------------------|------------|---------------|
| How much did the intervention help you with your anxiety?       | 9<br>(36%)            | 12<br>(48%)        | 4<br>(16%) | 3.3<br>(0.84) |
| How much did the intervention help in other areas of your life? | 10<br>(40%)           | 11<br>(44%)        | 4<br>(16%) | 3.3<br>(0.85) |
| How likely are you to recommend the intervention?               | 21<br>(84%)           | 3<br>(12%)         | 1<br>(4%)  | 4.3<br>(0.84) |

No participants reported “Not at All Helpful”

*Results from the Final Acceptability Questionnaire continued.*

| Item                                                                  | Extremely -<br>Very Helpful | Somewhat<br>Helpful | Slightly<br>Unhelpful | Mean<br>(SD)  |
|-----------------------------------------------------------------------|-----------------------------|---------------------|-----------------------|---------------|
| Booklet 1 (Anxiety and PH)                                            | 18 (72%)                    | 6 (24%)             | 1 (4%)                | 3.8<br>(0.75) |
| Booklet 2 & 3 (What keeps anxiety going<br>and The power of thoughts) | 23 (92%)                    | 2 (8%)              | 0 (0%)                | 4.1<br>(0.49) |
| Booklet 4 (The power of your actions)                                 | 17 (68%)                    | 8 (32%)             | 0 (0%)                | 3.9<br>(0.74) |
| Booklet 4 – (Other factors affecting anxiety)                         | 18 (72%)                    | 7 (28%)             | 0 (0%)                | 3.9<br>(0.7)  |
| Homework tasks                                                        | 19 (76%)                    | 6 (24%)             | 0 (0%)                | 3.9<br>(0.65) |

No participant reported “Not at All Helpful”

*Results from the final acceptability questionnaire continued.*

| Question                                                        | Strongly-<br>Somewhat<br>Agree | Neither<br>Agree nor<br>Disagree | Strongly –<br>Somewhat<br>Disagree | Mean<br>(SD)  |
|-----------------------------------------------------------------|--------------------------------|----------------------------------|------------------------------------|---------------|
| I feel more in control of my anxiety                            | 22<br>(88%)                    | 3<br>(12%)                       | 0<br>(0%)                          | 4.1<br>(0.6)  |
| People diagnosed with PH would<br>benefit from the intervention | 25<br>(100%)                   | 0<br>(0%)                        | 0<br>(0%)                          | 4.8<br>(0.37) |
| Family and friends would benefit from<br>this intervention      | 23<br>(92%)                    | 2<br>(8%)                        | 0<br>(0%)                          | 4.4<br>(0.65) |
| I valued the intervention was specific<br>to PH                 | 24<br>(96%)                    | 0<br>(0%)                        | 1<br>(4%)                          | 4.7<br>(0.85) |
| I valued being contacted part-way<br>through                    | 24<br>(96%)                    | 1<br>(4%)                        | 0<br>(0%)                          | 4.6<br>(0.58) |
| The level of support I received was<br>sufficient`              | 24<br>(96%)                    | 1<br>(4%)                        | 0<br>(0%)                          | 4.6<br>(0.58) |
| I was given enough time to work<br>through the intervention     | 24<br>(96%)                    | 1<br>(4%)                        | 0<br>(0%)                          | 4.3<br>(0.95) |
| Health outcomes were relevant to my<br>difficulties             | 20<br>(80%)                    | 3<br>(12%)                       | 2<br>(8%)                          | 4 (1)         |

PH = Pulmonary Hypertension
