# Supplementary material for: Self-help cognitive behavioural therapy for anxiety in pulmonary hypertension: pilot randomised controlled trial
Source: PubMed Central journal article supplement — ERJ Open Res. 2022 Mar 7;8(1):00526-2021. doi: 10.1183/23120541.00526-2021 (PMC8899500; doi:10.1183/23120541.00526-2021), 2022-03-07
Supplement: 00526-2021.SUPPLEMENT6.pdf [file 00526-2021.SUPPLEMENT6.pdf]

## Supplement 6

Anxiety and depression scores for participants in the CBT (n=37) and control group (n=40), values = n (%)

| Group                        | Measure                      | Baseline                     | Post-intervention | One-month follow up |            |
|------------------------------|------------------------------|------------------------------|-------------------|---------------------|------------|
| CBT                          | Anxiety                      | 0-4 Minimal                  | 4 (10.8%)         | 8 (27.6%)           | 15 (53.5%) |
|                              |                              | 5-9 Mild                     | 16 (43.2%)        | 11 (37.9%)          | 6 (21.4%)  |
|                              |                              | 10-14 Moderate               | 7 (18.9%)         | 9 (31%)             | 6 (21.4%)  |
|                              |                              | 15-21 Severe                 | 10 (27%)          | 1 (3.4%)            | 1 (3.6%)   |
|                              |                              | Above cut off ( $\geq 8$ )   | 24 (64.9%)        | 16 (55.2%)          | 7 (25%)    |
|                              |                              | Reliable change ( $\geq 4$ ) | -                 | 13 (44.8%)          | 20 (71.4%) |
|                              | Depression                   | 0-4 Minimal                  | 3 (8.1%)          | 10 (34.5%)          | 11 (39.3%) |
|                              |                              | 5-9 Mild                     | 9 (24.4%)         | 6 (20.7%)           | 8 (28.6%)  |
|                              |                              | 10-14 Moderate               | 8 (21.6%)         | 12 (41.4%)          | 7 (25%)    |
|                              |                              | 15-19 Moderately Severe      | 15 (40.5%)        | 1 (3.4%)            | 1 (3.6%)   |
|                              |                              | 20-27 Severe                 | 2 (5.4%)          | 0 (0%)              | 1 (3.6%)   |
|                              |                              | Above cut off ( $\geq 10$ )  | 25 (67.6%)        | 13 (44.8%)          | 9 (32.1%)  |
|                              | Reliable change ( $\geq 6$ ) | -                            | 13 (44.8%)        | 11 (39.3%)          |            |
|                              | Control                      | Anxiety                      | 0-4 Minimal       | 3 (7.5%)            | 4 (12.9%)  |
| 5-9 Mild                     |                              |                              | 13 (32.5%)        | 10 (32.3%)          | 11 (32.4%) |
| 10-14 Moderate               |                              |                              | 11 (27.5%)        | 7 (22.6%)           | 8 (23.5%)  |
| 15-21 Severe                 |                              |                              | 13 (32.5%)        | 10 (32.3%)          | 10 (29.4%) |
| Above cut off ( $\geq 8$ )   |                              |                              | 30 (75%)          | 18 (58.1%)          | 22 (64.7%) |
| Reliable change ( $\geq 4$ ) |                              |                              | -                 | 9 (29%)             | 15 (44.1%) |
| Control                      | Depression                   | 0-4 Minimal                  | 3 (7.5%)          | 4 (12.9%)           | 6 (15.7%)  |
|                              |                              | 5-9 Mild                     | 12 (30%)          | 9 (29%)             | 10 (29.4%) |
|                              |                              | 10-14 Moderate               | 6 (15%)           | 8 (25.8%)           | 5 (14.7%)  |
|                              |                              | 15-19 Moderately Severe      | 15 (37.5%)        | 9 (29%)             | 7 (20.5%)  |
|                              |                              | 20-27 Severe                 | 4 (10%)           | 1 (3.2%)            | 6 (17.26%) |
|                              |                              | Above cut off ( $\geq 10$ )  | 25 (62.5%)        | 18 (58.1%)          | 18 (52.9%) |
| Reliable change ( $\geq 6$ ) | -                            | 7 (22.6%)                    | 6 (17.6%)         |                     |            |

CBT = Cognitive Behavioural Therapy
